# Supplementary material for: Decrease in waist-to-hip ratio reduced the development of chronic kidney disease in non-obese non-alcoholic fatty liver disease
Source: PubMed Central journal article supplement (PMC7265367; doi:10.1038/s41598-020-65940-y), 2020-06-02
Supplement: 41598_2020_65940_MOESM1_ESM.pdf [file 41598_2020_65940_MOESM1_ESM.pdf]

# **Decrease in waist-to-hip ratio reduced the development of chronic kidney disease in non-obese non-alcoholic fatty liver disease**

Young Eun Chon<sup>1</sup>, Hyung Jong Kim<sup>2</sup>, Yu Bum Choi<sup>2</sup>, Seong Gyu Hwang<sup>1</sup>, Kyu Sung Rim<sup>1</sup>,  
Mi Na Kim<sup>1</sup>, Joo Ho Lee<sup>1</sup>, Yeonjung Ha<sup>1</sup>, and Mi Jung Lee<sup>2\*</sup>

<sup>1</sup>Division of Gastroenterology, Department of Internal Medicine, Institute of Gastroenterology, CHA Bundang Medical Center, CHA University, Seongnam, Korea

<sup>2</sup>Department of Internal Medicine, CHA Bundang Medical Center, CHA University, Seongnam, Korea

\*Corresponding author: alwyd8025@gmail.com

## **Corresponding Author:**

**Mi Jung Lee, M.D.**

Department of Internal Medicine, CHA Bundang Medical Center,  
CHA University College of Medicine, Seongnam, Republic of Korea  
59 Yatap-ro, Bundang-gu, Seongnam, Gyeonggi-do, Korea, 13496

Tel: 82-31-780-1925

Fax: 82-31-780-5305

E-mail: alwyd8025@gmail.com

**Supplementary Table 1.** Comparison of metabolic profiles between non-obese control and non-obese NAFLD

|                                 | Non-obese control<br>(n=3,095) | Non-obese NAFLD<br>(n=459) | P      |
|---------------------------------|--------------------------------|----------------------------|--------|
| Age, years                      | 51.1 ± 8.8                     | 53.9 ± 8.5                 | <0.001 |
| Men, n (%)                      | 1,425 (46.0%)                  | 213 (46.4%)                | 0.9    |
| Diabetes mellitus, n (%)        | 32 (1.0%)                      | 67 (14.6%)                 | <0.001 |
| Hypertension, n (%)             | 202 (6.5%)                     | 86 (18.7%)                 | <0.001 |
| Metabolic syndrome, n (%)       | 314 (10.1%)                    | 372 (81.0%)                | <0.001 |
| BMI, kg/m <sup>2</sup>          | 22.4 ± 1.8                     | 23.3 ± 1.4                 | <0.001 |
| WHR                             | 0.87 ± 0.03                    | 0.89 ± 0.03                | <0.001 |
| MAP, mmHg                       | 89.6 ± 12.1                    | 97.4 ± 11.5                | <0.001 |
| AST, IU/L                       | 25.0 (22.0-29.0)               | 29.0 (25.0-37.0)           | <0.001 |
| ALT, IU/L                       | 19.0 (16.0-25.0)               | 29.0 (22.0-45.0)           | <0.001 |
| Total bilirubin, mg/dL          | 0.6 ± 0.3                      | 0.6 ± 0.3                  | <0.001 |
| GGT, U/L                        | 21.0 (11.0-23.0)               | 25.0 (14.0-53.0)           | <0.001 |
| Fasting glucose, mg/dL          | 82.9 ± 13.6                    | 93.4 ± 31.7                | <0.001 |
| HOMA-IR                         | 1.28 ± 0.59                    | 2.42 ± 1.97                | <0.001 |
| Total cholesterol, mg/dL        | 186.3 ± 33.1                   | 194.4 ± 35.8               | <0.001 |
| HDL-C, mg/dL                    | 47.0 ± 10.0                    | 40.6 ± 9.7                 | <0.001 |
| LDL-C, mg/dL                    | 117.3 ± 31.4                   | 115.8 ± 35.6               | 0.35   |
| Triglyceride, mg/dL             | 128.9 ± 66.6                   | 220.6 ± 154.2              | <0.001 |
| CRP, mg/dL                      | 0.11 (0.05-0.19)               | 0.16 (0.08-0.27)           | <0.001 |
| eGFR, mL/min/1.73m <sup>2</sup> | 93.9 ± 12.9                    | 93.2 ± 12.4                | 0.25   |

Note: Data are expressed as the mean ± standard deviation, median (interquartile range), or number of patients (percent).

*Abbreviations:* ALT, alanine aminotransferase; AST, aspartate aminotransferase; BMI, body mass index; CRP, C-reactive protein; eGFR, estimated glomerular filtration rate; GGT, gamma glutamyl transferase; HDL-C, high-density lipoprotein cholesterol; HOMA-IR, homeostatic model assessment of insulin resistance; LDL-C, low-density lipoprotein cholesterol; MAP, mean arterial pressure; NAFLD, non-alcoholic fatty liver disease; WHR, waist-to-hip ratio.

**Supplementary Table 2.** Categorization of NAFLD patients according to TA-% WHR change and TA-%BW change

|                       | All NAFLD<br>(n=1,563) | Non-obese NAFLD<br>(n=459) | Obese NAFLD<br>(n=1,104) |
|-----------------------|------------------------|----------------------------|--------------------------|
| <b>TA-%WHR change</b> |                        |                            |                          |
| ≤-5%                  | 131 (8.4%)             | 28 (6.1%)                  | 103 (9.3%)               |
| >-5% to <5%           | 1,200 (76.8%)          | 351 (76.5%)                | 849 (76.9%)              |
| ≥5%                   | 232 (14.8%)            | 80 (17.4%)                 | 152 (13.8%)              |
| <b>TA-%BW change</b>  |                        |                            |                          |
| ≤-5%                  | 479 (30.6%)            | 122 (26.6%)                | 357 (32.3%)              |
| >-5% to <5%           | 940 (60.1%)            | 279 (60.8%)                | 661 (59.9%)              |
| ≥5%                   | 144 (9.2%)             | 58 (12.6%)                 | 86 (7.8%)                |

*Abbreviations:* NAFLD, non-alcoholic fatty liver disease; TA-%BW change, time-averaged percent weight change; TA-%WHR change, time-averaged percent waist-to-hip ratio change.

**Supplementary Table 3.** Changes in HOMA-IR according to TA-% WHR change and TA-% BW change categories

|                                          | $\Delta$ HOMA-IR per year |                       |                       |
|------------------------------------------|---------------------------|-----------------------|-----------------------|
|                                          | All NAFLD                 | Non-obese NAFLD       | Obese NAFLD           |
| <b>TA-% WHR change</b>                   |                           |                       |                       |
| $\leq 5\%$                               | -0.04 (-0.09 to 0.02)     | -0.02 (-0.05 to 0.02) | -0.04 (-0.11 to 0.02) |
| $>5\%$ to $<5\%$                         | 0.04 (0.01 to 0.06)       | 0 (-0.05 to 0.04)     | 0.06 (0.03 to 0.09)   |
| $\geq 5\%$                               | 0.19 (0.05 to 0.28)       | 0.15 (-0.08 to 0.39)  | 0.18 (0.05 to 0.31)   |
| <sup>1</sup> P <sub>(group × time)</sub> | <0.001                    | <0.001                | <0.001                |
| <b>TA-% BW change</b>                    |                           |                       |                       |
| $\leq 5\%$                               | 0.01 (-0.02 to 0.05)      | 0.03 (-0.02 to 0.07)  | 0.01 (-0.03 to 0.05)  |
| $>5\%$ to $<5\%$                         | 0.05 (0.01 to 0.08)       | -0.03 (-0.08 to 0.03) | 0.08 (0.04 to 0.12)   |
| $\geq 5\%$                               | 0.22 (0.07 to 0.37)       | 0.25 (-0.07 to 0.58)  | 0.20 (0.07 to 0.32)   |
| <sup>1</sup> P <sub>(group × time)</sub> | <0.001                    | <0.001                | <0.001                |

Note: Data are expressed as the mean with 95% confidence interval.

<sup>1</sup>P<sub>(group × time)</sub> was calculated by mixed-effect model.

Abbreviations: HOMA-IR, homeostatic model assessment of insulin resistance; NAFLD, non-alcoholic fatty liver disease; TA-% BW change, time-averaged percent body weight change; TA-% WHR change, time-averaged percent waist-to-hip ratio change.

**Supplementary Table 4.** Multivariable Cox regression analyses for risk of CKD development according to the WHR and BW changes categories in NAFLD patients

|                 | <sup>1</sup> Model 1 | <sup>2</sup> Model 2 |
|-----------------|----------------------|----------------------|
| TA-% WHR change | HR (95% CI)          | HR (95% CI)          |
| ≤-5%            | 0.305 (0.197-0.473)  | 0.301 (0.194-0.466)  |
| >-5% to <5%     | 1 (reference)        | 1 (reference)        |
| ≥5%             | 1.008 (0.999-1.016)  | 0.923 (0.702-1.215)  |
| TA-% BW change  |                      |                      |
| ≤-5%            | 0.579 (0.464-0.723)  | 0.587 (0.470-0.733)  |
| >-5% to <5%     | 1 (reference)        | 1 (reference)        |
| ≥5%             | 0.837 (0.588-1.190)  | 0.823 (0.579-1.171)  |

<sup>1</sup>Model 1: adjusted for age, sex, education levels, income levels, smoking status, diabetes mellitus, dyslipidemia, history of CVD, CRP concentrations, baseline eGFR, and mean arterial pressure.

<sup>2</sup>Model 2: adjusted for age, sex, education levels, income levels, smoking status, diabetes mellitus, hypertension, dyslipidemia, history of CVD, CRP concentrations, baseline eGFR, and FIB-4.

Abbreviations: CI, confidence interval; CKD, chronic kidney disease; CRP, C-reactive protein; CVD, cardiovascular disease; eGFR, estimated glomerular filtration rate; FIB-4, fibrosis 4; HR, hazard ratio; NAFLD, non-alcoholic fatty liver disease, TA-% BW change, time-averaged percent body weight change; TA-% WHR change, time-averaged percent waist-to-hip ratio change.

**Supplementary Table 5.** Definition of NAFLD liver fat score and liver fibrosis score

|                       |                                                                                                                                                                                                                                          |
|-----------------------|------------------------------------------------------------------------------------------------------------------------------------------------------------------------------------------------------------------------------------------|
| NAFLD liver fat score | $-2.89 + 1.18 \times \text{metabolic syndrome (yes = 1/no = 0)} + 0.45 \times \text{diabetes (yes = 2/no = 0)} + 0.15 \times \text{fasting insulin } (\mu\text{U/L}) + 0.04 \times \text{AST (IU/L)} + 0.94 \times \text{AST/ALT ratio}$ |
| FIB-4 score           | $(\text{Age [years]} \times \text{AST [U/L]}) / (\text{Platelet count [10}^9\text{/L]} \times \text{ALT [U/L]}^{1/2})$                                                                                                                   |

*Abbreviations:* ALT, alanine aminotransferase; AST, aspartate aminotransferase; FIB-4, fibrosis-4; NAFLD, non-alcoholic fatty liver disease.

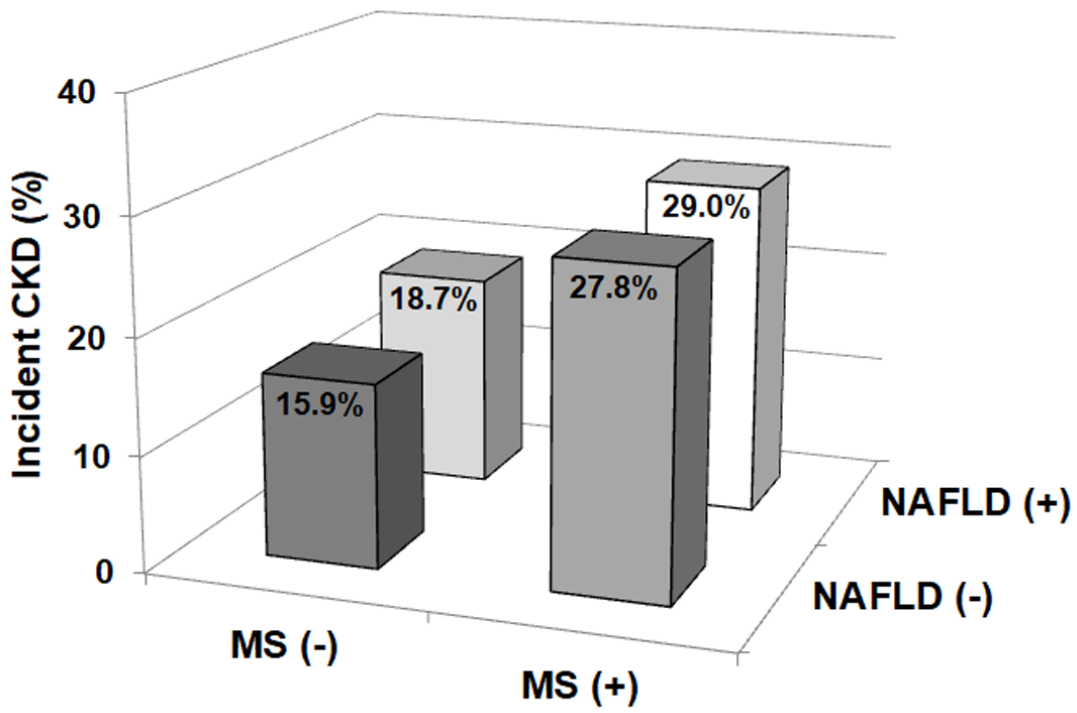

**Supplementary Figure 1. Incidence rate of CKD in the 4 groups based on the combination of NAFLD and MS.** Abbreviations: CKD, chronic kidney disease; MS, metabolic syndrome; NAFLD, non-alcoholic fatty liver disease.



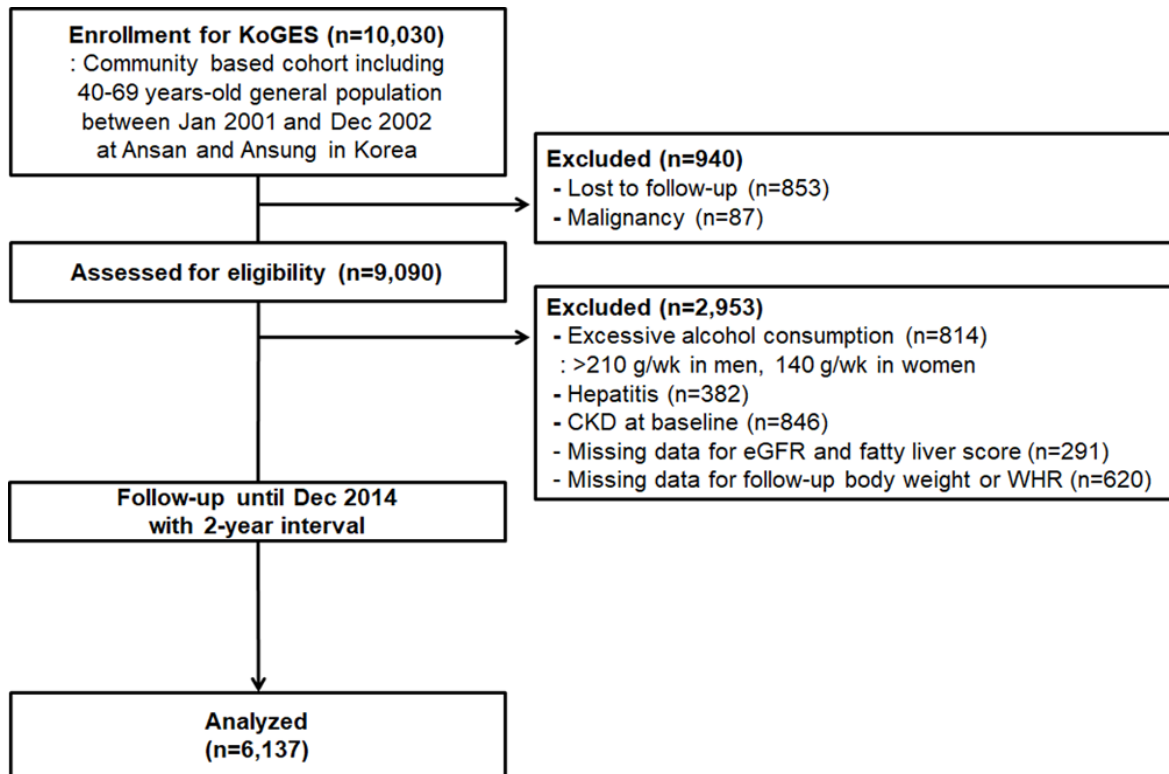

**Supplementary Figure 2. Incidence rate of CKD in the 4 groups based on the combination of NAFLD and MS.** Abbreviations: CKD, chronic kidney disease; MS, metabolic syndrome; NAFLD, non-alcoholic fatty liver disease.
